# Supplementary material for: An apportionment method for the oxidative potential of atmospheric particulate matter sources: application to a one-year study in Chamonix, France
Source: Copernicus journal article supplement (doi:10.5194/acp-18-9617-2018), 2018-07-09
Supplement: Supplementary file 1 [file acp-18-9617-2018-supplement.pdf]

Supplement of Atmos. Chem. Phys., 18, 9617–9629, 2018  
<https://doi.org/10.5194/acp-18-9617-2018-supplement>  
© Author(s) 2018. This work is distributed under  
the Creative Commons Attribution 4.0 License.

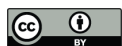

*Supplement of*

## **An apportionment method for the oxidative potential of atmospheric particulate matter sources: application to a one-year study in Chamonix, France**

**Samuël Weber et al.**

*Correspondence to:* Gaëlle Uzu ([gaelle.uzu@ird.fr](mailto:gaelle.uzu@ird.fr))

The copyright of individual parts of the supplement might differ from the CC BY 4.0 License.

## S1 Sources profiles from the PMF

**Biomass burning** is a profile highly represented by biomass burning proxy: the levoglucosan and the methoxyphenols. The  $BC_{bb}$  and  $OC^*$  are also mainly in this factor. Associated with it, some potassium and rubidium are also present in this source. These proxy are well-known to be tracers of biomass burning activities (Godoy et al., 2005; Jordan et al., 2006; Nava et al., 2015; Puxbaum et al., 2007)

**Vehicular emissions** are associated to a very large contribution of metals (Cu, Mo, Pb, Sb, Fe, Zr, Ti) and a significant amount of carbonaceous matter (mainly  $BC_{ff}$ ) and organic compound (HOP). The two sources from vehicle' traffic which are "exhaust" (i.e. fuel combustion (Allen et al., 2001; Hu et al., 2009; Viana et al., 2008)) and "non-exhaust" (i.e. road abrasion, brake wear, etc. (Sanders et al., 2003; Sternbeck et al., 2002)) are mixed in this profile.

**Primary biogenic** emissions are identified thanks to the presence of polyols (sum of arabitol, sorbitol and mannitol) coming from the biogenic activity (fungi, pollens and bacteria) (Bauer et al., 2008) or from vegetal debris (Yttri et al., 2007). The temporal contribution of this factor (mainly during summer) also pledges in favour of the biogenic activity.

**Secondary biogenic emissions** are dominated by the MSA (methane sulfonic acid), product by the oxidation of the DMS (dimethyl sulfate). The DMS is well-known for being emitted by marine algae (Saltzman et al., 1983; Zhang et al., 2014) or vegetation and soil micro-biology (Jardine et al., 2015).

**Crustal dust** is characterized with a high predominance of  $Mg^{2+}$ ,  $Ca^{2+}$ , Ti, Mn, Fe, which are elements of the terrestrial crust. We identified this source as re-suspension of soil or rock dust (Almeida et al., 2005; Dall'Osto et al., 2013; Moreno et al., 2011; Putaud et al., 2004).

**Sea/road salt** shows a high proportion of  $Na^+$  and  $Cl^-$ , but also  $Mg^{2+}$ . These ions are proxy of sea salt (Belis et al., 2013; O'Dowd et al., 1997; Pio et al., 2007) as well as road salt, especially during winter in the Alps region (Air Rhne-Alpes, 2012).

**Nitrate rich** with a high concentration of nitrate ions ( $NO_3^-$ ) associates with ammonium ( $NH_4^+$ ). It indicates the presence of ammonium nitrate  $NO_3NH_4$ .

**Sulfate rich** with a high concentration of sulfate ions ( $SO_4^{2-}$ ) associates with ammonium ( $NH_4^+$ ). It indicates the presence of ammonium sulfate  $SO_4(NH_4)_2$ .

Table 1 summaries the factor profiles in  $1 \mu g$  of PM of each source while Fig. 1 presents the fraction of each species associated with each source.

Table S1: Concentration of species in 1  $\mu\text{g}$  of PM for each source attributed by the PMF model.

| specie                        | Primary<br>biogenic | Sea/road<br>salt | Secondary<br>biogenic | Crustal<br>dust | Vehicular | Biomass<br>burning | Nitrate<br>rich | Sulfate<br>rich |
|-------------------------------|---------------------|------------------|-----------------------|-----------------|-----------|--------------------|-----------------|-----------------|
| $\text{ng}/\mu\text{g}$       |                     |                  |                       |                 |           |                    |                 |                 |
| OC*                           | 412.86              | 228.75           | 733.01                | 180.92          | 301.20    | 401.67             | 225.14          | 249.95          |
| BC <sub>bb</sub>              | 15.37               | 19.29            | 22.65                 | 4.35            | 24.69     | 72.99              | 10.96           | 6.91            |
| BC <sub>ff</sub>              | 160.58              | 72.08            | 116.95                | 8.35            | 295.70    | 0                  | 63.05           | 0.48            |
| MSA                           | 0.27                | 0                | 18.38                 | 0               | 0.07      | 0                  | 0.37            | 0.09            |
| Cl <sup>-</sup>               | 0                   | 36.48            | 0                     | 0               | 0         | 4.74               | 4.35            | 0               |
| NO <sub>3</sub> <sup>-</sup>  | 4.58                | 0                | 71.42                 | 102.12          | 0         | 9.41               | 427.27          | 18.97           |
| SO <sub>4</sub> <sup>2-</sup> | 26.33               | 20.65            | 37.48                 | 72.18           | 0         | 39.76              | 0               | 302.41          |
| Na <sup>+</sup>               | 3.07                | 62.22            | 21.23                 | 0.09            | 2.80      | 1.52               | 0               | 0.62            |
| NH <sub>4</sub> <sup>+</sup>  | 11.47               | 4.25             | 0                     | 0               | 6.02      | 8.82               | 86.69           | 108.24          |
| K <sup>+</sup>                | 9.11                | 3.96             | 10.18                 | 3.70            | 2.21      | 9.53               | 3.33            | 3.33            |
| Mg <sup>2+</sup>              | 0.15                | 0.68             | 2.86                  | 4.43            | 0         | 0.39               | 0               | 0.52            |
| Ca <sup>2+</sup>              | 0                   | 0                | 11.74                 | 115.47          | 5.62      | 3.07               | 8.54            | 11.97           |
| Levogluconan                  | 8.07                | 21.00            | 2.37                  | 0               | 13.77     | 107.71             | 32.88           | 4.64            |
| $\Sigma$ polyols              | 14.55               | 0                | 3.27                  | 1.09            | 0         | 0.64               | 0.43            | 1.66            |
| $\Sigma$ methoxy              | 0                   | 0                | 0                     | 0.60            | 0         | 11.34              | 0               | 0               |
| Fe                            | 12.14               | 21.73            | 8.04                  | 38.82           | 42.06     | 1.02               | 0               | 1.00            |
| $\text{pg}/\mu\text{g}$       |                     |                  |                       |                 |           |                    |                 |                 |
| As                            | 16.16               | 2.32             | 55.47                 | 37.70           | 64.14     | 0.00               | 12.97           | 16.55           |
| Cu                            | 552.51              | 421.26           | 908.64                | 261.28          | 1147.23   | 247.42             | 0               | 92.72           |
| Mn                            | 150.02              | 146.43           | 381.62                | 1224.90         | 495.22    | 21.15              | 4.25            | 140.64          |
| Mo                            | 17.22               | 16.99            | 39.99                 | 13.09           | 82.84     | 0                  | 0               | 13.62           |
| Ni                            | 4.17                | 21.56            | 0.13                  | 106.58          | 46.94     | 0                  | 0               | 18.64           |
| Pb                            | 75.42               | 0                | 119.94                | 156.67          | 380.18    | 0                  | 99.35           | 113.36          |
| Rb                            | 11.03               | 18.15            | 0                     | 69.91           | 34.72     | 27.09              | 0               | 0               |
| Sb                            | 25.32               | 28.88            | 27.92                 | 0               | 80.69     | 0                  | 6.15            | 3.11            |
| Ti                            | 308.11              | 135.57           | 253.05                | 1754.87         | 291.41    | 0                  | 42.31           | 101.03          |
| V                             | 28.44               | 21.14            | 31.64                 | 92.69           | 0         | 0                  | 0               | 14.14           |
| Zn                            | 377.67              | 225.73           | 1240.86               | 548.98          | 2091.33   | 139.94             | 602.30          | 373.39          |
| Zr                            | 45.51               | 11.33            | 16.67                 | 34.12           | 52.09     | 6.24               | 6.56            | 0               |
| $\Sigma$ HOP                  | 0                   | 145.45           | 4.77                  | 8.66            | 140.33    | 0.00               | 34.46           | 0               |

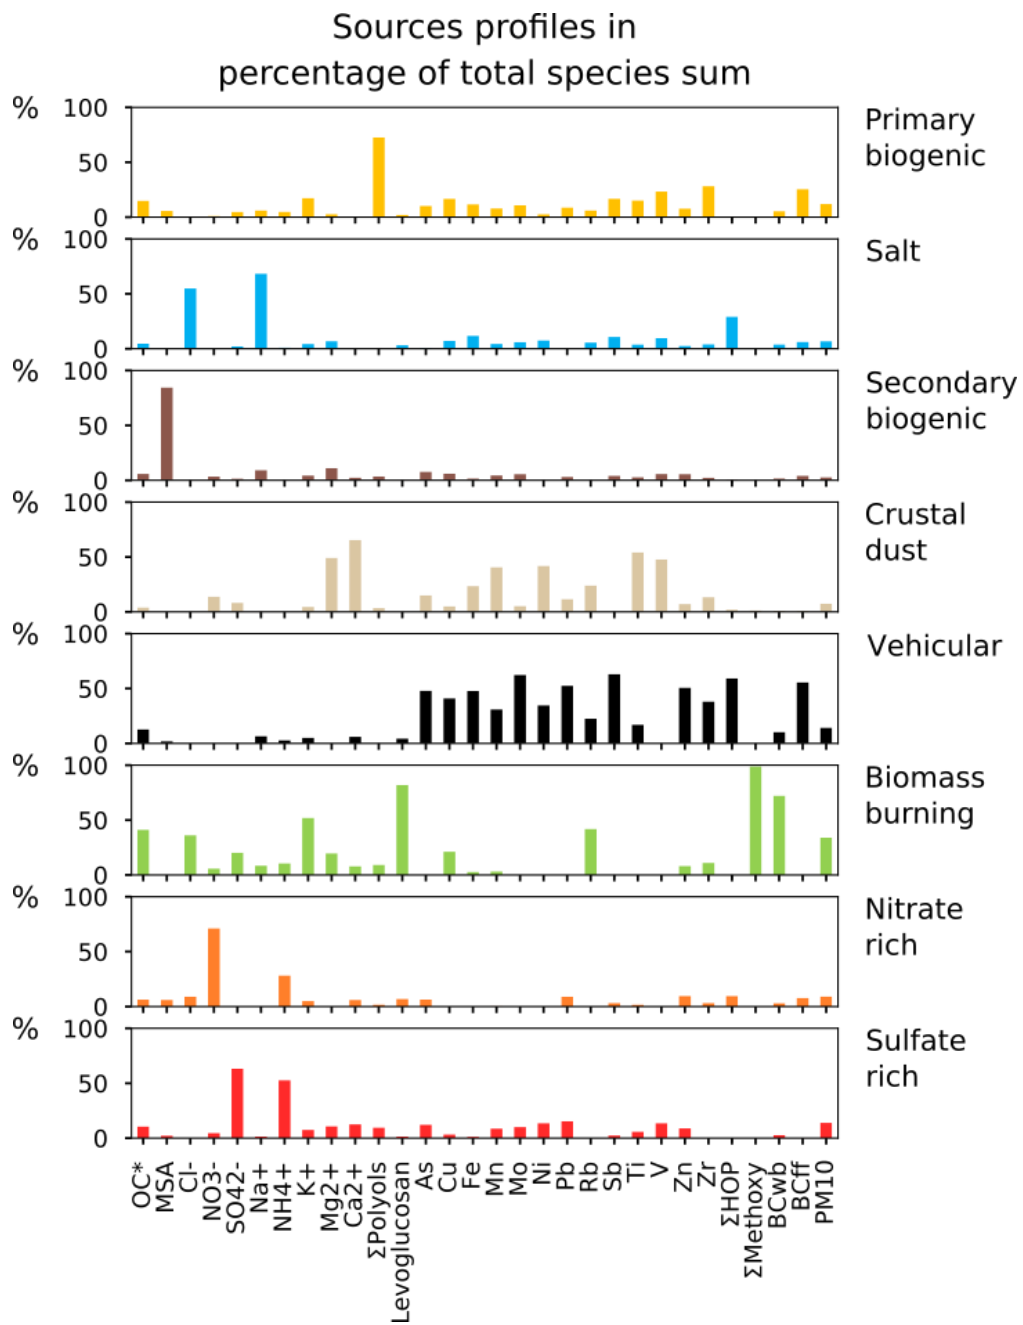

Figure S1: Percentage of the ambient species concentration apportioned in each factor attributed by the PMF model.

## S2 Correlation between OP and chemical species, and OP and sources

The univariate correlation on an annual basis between the OP values and the concentrations of chemical species was first investigated and is presented in Fig. 2. We see a strong relationship between some of the organic species and the OP (levoglucosan, methoxyphenol) as well as the carbonaceous matter (OC and BC) for both tests. It suggests important contributions of biomass burning source and fossil fuel burning activities to the OP's. The metals Cu, Rb, and Sb appear highly correlated to the OP, but Ni, Ti and V do not. The results for the ions indicate weak positive correlations with both OP only. We also note that the polyols and MSA show a tendency with anti-correlations with both OPs. Most of these results are strongly affected by the really high changes in concentrations during the winter and the summer periods, in part related to the local impact of meteorology and inversion layers in winter (Calas et al., 2018).

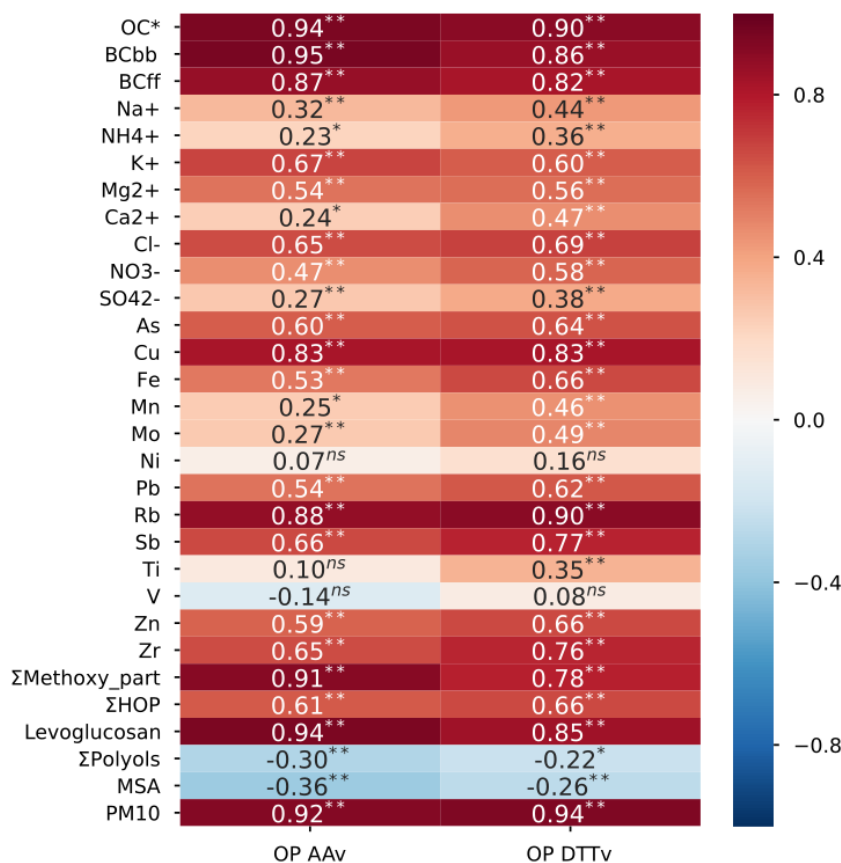

Figure S2: Pearson's correlation coefficient between the concentrations of the species and the OP AA<sub>v</sub> and OP DTT<sub>v</sub> activity from the 2, November 2013 to the 31, October 2014 (97 samples). \*\*: p-values <0.01, \*: p-value <0.05, ns: p-value >0.05.

The univariate-correlation between the contributions of the sources of PM deduced from the PMF and the OPs is presented Fig. 3. It emphasized the hypothesis of the high contribution of the biomass burning and vehicular sources to the OP of the PM<sub>10</sub>. We do not see very large differences between the two tests, expect for the crustal dust source (no correlation with the OP AA<sub>v</sub> but a positive one for the OP DTT<sub>v</sub>).

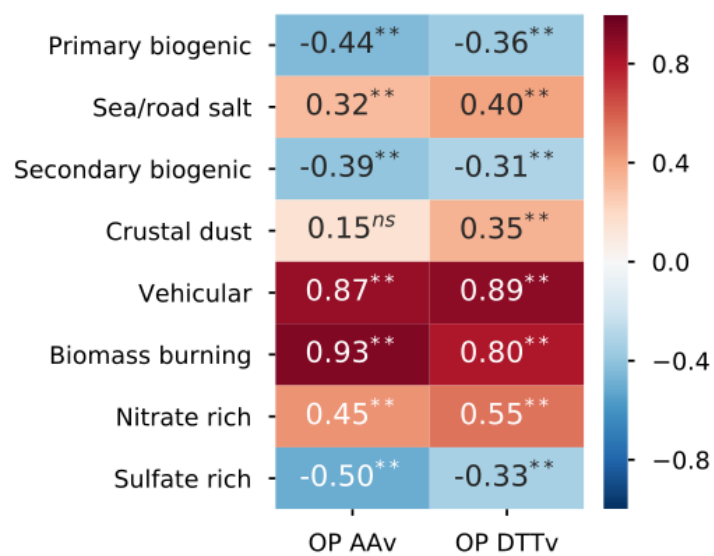

Figure S3: Pearson's correlation coefficient between the PM concentrations of the sources from the PMF and the OP AA<sub>v</sub> and OP DTT<sub>v</sub> activity from the 14, November 2013 to the 31, October 2014 (85 samples). \*\*: p-values <0.01, \*: p-value <0.05, ns: p-value >0.05.

## S3 Additional reference

### References

- Air Rhne-Alpes: Influence des pratiques de viabilité hivernale sur les concentrations de PM<sub>10</sub>, Tech. rep., Air Rhne-Alpes, URL [http://www.air-rhonealpes.fr/sites/ra/files/publications\\_import/files/2012\\_influence\\_salage\\_pm10\\_rhonealpes.pdf](http://www.air-rhonealpes.fr/sites/ra/files/publications_import/files/2012_influence_salage_pm10_rhonealpes.pdf), 2012.
- Allen, A. G., Nemitz, E., Shi, J. P., Harrison, R. M., and Greenwood, J. C.: Size distributions of trace metals in atmospheric aerosols in the United Kingdom, *Atmospheric Environment*, 35, 4581–4591, URL <http://www.sciencedirect.com/science/article/pii/S135223100100190X>, 2001.
- Almeida, S., Pio, C., Freitas, M., Reis, M., and Trancoso, M.: Source apportionment of fine and coarse particulate matter in a sub-urban area at the Western European Coast, *Atmospheric Environment*, 39, 3127–3138, <https://doi.org/10.1016/j.atmosenv.2005.01.048>, URL <http://linkinghub.elsevier.com/retrieve/pii/S1352231005001378>, 2005.
- Belis, C., Karagulian, F., Larsen, B., and Hopke, P.: Critical review and meta-analysis of ambient particulate matter source apportionment using receptor models in Europe, *Atmospheric Environment*, 69, 94–108, <https://doi.org/10.1016/j.atmosenv.2012.11.009>, URL <http://linkinghub.elsevier.com/retrieve/pii/S1352231012010540>, 2013.
- Calas, A., Uzu, G., Martins, J. M. F., Houdier, S., Thomas, F., Molton, F., Lacroix, T., Charron, A., Jacob, V., Besombes, J.-L., Chevrier, F., Brulfert, G., Dunster, C., Oliete, A., Kelly, F. J., and Jaffrezo, J.-L.: Comparison between five acellular oxidative potential measurement assays performed on a yearly series of PM<sub>10</sub> samples from the city of Chamonix (France), with detailed chemistry, "in prep. for ACPD", 2018.
- Dall'Osto, M., Querol, X., Amato, F., Karanasiou, A., Lucarelli, F., Nava, S., Calzolari, G., and Chiari, M.: Hourly elemental concentrations in PM<sub>2.5</sub> aerosols sampled simultaneously at urban background and road site during SAPUSS diurnal variations and PMF receptor modelling, *Atmospheric Chemistry and Physics*, 13, 4375–4392, <https://doi.org/10.5194/acp-13-4375-2013>, URL <http://www.atmos-chem-phys.net/13/4375/2013/>, 2013.
- Godoy, M. L. D., Godoy, J. M., and Artaxo, P.: Aerosol source apportionment around a large coal fired power plant Thermoelectric Complex Jorge Lacerda, Santa Catarina, Brazil, *Atmospheric Environment*, 39, 5307–5324, <https://doi.org/10.1016/j.atmosenv.2005.05.033>, URL <http://linkinghub.elsevier.com/retrieve/pii/S1352231005004899>, 2005.
- Hu, S., Herner, J. D., Shafer, M., Robertson, W., Schauer, J. J., Dwyer, H., Collins, J., Huai, T., and Ayala, A.: Metals emitted from heavy-duty diesel vehicles equipped with advanced PM and NO<sub>x</sub> emission controls, *Atmospheric Environment*, 43, 2950–2959, <https://doi.org/10.1016/j.atmosenv.2009.02.052>, URL <http://linkinghub.elsevier.com/retrieve/pii/S1352231009001800>, 2009.
- Jardine, K., Yaez-Serrano, A. M., Williams, J., Kunert, N., Jardine, A., Taylor, T., Abrell, L., Artaxo, P., Guenther, A., Hewitt, C. N., House, E., Florentino, A. P., Manzi, A., Higuchi, N., Kesselmeier, J., Behrendt, T., Veres, P. R., Derstroff, B., Fuentes, J. D., Martin, S. T., and Andreae, M. O.: Dimethyl sulfide in the Amazon rain forest: DMS in the Amazon, *Global Biogeochemical Cycles*, 29, 19–32, <https://doi.org/10.1002/2014GB004969>, URL <http://doi.wiley.com/10.1002/2014GB004969>, 2015.

- Jordan, T. B., Seen, A. J., and Jacobsen, G. E.: Levoglucosan as an atmospheric tracer for woodsmoke, *Atmospheric Environment*, 40, 5316–5321, <https://doi.org/10.1016/j.atmosenv.2006.03.023>, URL <http://linkinghub.elsevier.com/retrieve/pii/S1352231006003104>, 2006.
- Moreno, T., Querol, X., Alastuey, A., Reche, C., Cusack, M., Amato, F., Pandolfi, M., Pey, J., Richard, A., Prvt, A. S. H., Furger, M., and Gibbons, W.: Variations in time and space of trace metal aerosol concentrations in urban areas and their surroundings, *Atmospheric Chemistry and Physics*, 11, 9415–9430, <https://doi.org/10.5194/acp-11-9415-2011>, URL <http://www.atmos-chem-phys.net/11/9415/2011/>, 2011.
- Nava, S., Lucarelli, F., Amato, F., Becagli, S., Calzolari, G., Chiari, M., Giannoni, M., Traversi, R., and Udisti, R.: Biomass burning contributions estimated by synergistic coupling of daily and hourly aerosol composition records, *Science of The Total Environment*, 511, 11–20, <https://doi.org/10.1016/j.scitotenv.2014.11.034>, URL <http://linkinghub.elsevier.com/retrieve/pii/S0048969714016167>, 2015.
- O’Dowd, C. D., Smith, M. H., Consterdine, I. E., and Lowe, J. A.: Marine aerosol, sea-salt, and the marine sulphur cycle: a short review, *Atmospheric Environment*, 31, 73 – 80, [https://doi.org/10.1016/S1352-2310\(96\)00106-9](https://doi.org/10.1016/S1352-2310(96)00106-9), 1997.
- Pio, C. A., Legrand, M., Oliveira, T., Afonso, J., Santos, C., Caseiro, A., Fialho, P., Barata, F., Puxbaum, H., Sanchez-Ochoa, A., Kasper-Giebl, A., Gelencsr, A., Preunkert, S., and Schock, M.: Climatology of aerosol composition (organic versus inorganic) at nonurban sites on a west-east transect across Europe, *Journal of Geophysical Research*, 112, <https://doi.org/10.1029/2006JD008038>, URL <http://doi.wiley.com/10.1029/2006JD008038>, 2007.
- Putaud, J.-P., Dingenen, R. V., Dell’Acqua, A., Raes, F., Matta, E., Decesari, S., Facchini, M. C., and Fuzzi, S.: Size-segregated aerosol mass closure and chemical composition in Monte Cimone (I) during MINATROC, *Atmospheric Chemistry and Physics*, 4, 889–902, URL <http://www.atmos-chem-phys.net/4/889/>, 2004.
- Puxbaum, H., Caseiro, A., Snchez-Ochoa, A., Kasper-Giebl, A., Claeys, M., Gelencsr, A., Legrand, M., Preunkert, S., and Pio, C.: Levoglucosan levels at background sites in Europe for assessing the impact of biomass combustion on the European aerosol background, *Journal of Geophysical Research*, 112, <https://doi.org/10.1029/2006JD008114>, URL <http://doi.wiley.com/10.1029/2006JD008114>, 2007.
- Saltzman, E. S., Savoie, D. L., Zika, R. G., and Prospero, J. M.: Methane Sulfonic Acid in the Marine Atmosphere, *Journal of Geophysical Research: Oceans*, 88, 10 897–10 902, <https://doi.org/10.1029/JC088iC15p10897>, URL <http://dx.doi.org/10.1029/JC088iC15p10897>, 1983.
- Sanders, P. G., Xu, N., Dalka, T. M., and Maricq, M. M.: Airborne Brake Wear Debris: Size Distributions, Composition, and a Comparison of Dynamometer and Vehicle Tests, *Environmental Science & Technology*, 37, 4060–4069, <https://doi.org/10.1021/es034145s>, URL <http://pubs.acs.org/doi/abs/10.1021/es034145s>, 2003.
- Sternbeck, J., Sjdin, ., and Andrasson, K.: Metal emissions from road traffic and the influence of re-suspension results from two tunnel studies, *Atmospheric Environment*, 36, 4735–4744, URL <http://www.sciencedirect.com/science/article/pii/S1352231002005617>, 2002.
- Viana, M., Kuhlbusch, T., Querol, X., Alastuey, A., Harrison, R., Hopke, P., Winiwarter, W., Vallius, M., Szidat, S., Prvt, A., Hueglin, C., Bloemen, H., Whlin, P., Vecchi, R., Miranda, A., Kasper-Giebl, A.,



- Maenhaut, W., and Hitzenberger, R.: Source apportionment of particulate matter in Europe: A review of methods and results, *Journal of Aerosol Science*, 39, 827–849, <https://doi.org/10.1016/j.jaerosci.2008.05.007>, URL <http://linkinghub.elsevier.com/retrieve/pii/S0021850208001018>, 2008.
- Yttri, K. E., Dye, C., and Kiss, G.: Ambient aerosol concentrations of sugars and sugar-alcohols at four different sites in Norway, *Atmospheric Chemistry and Physics*, 7, 4267–4279, URL <http://www.atmos-chem-phys.net/7/4267/2007/acp-7-4267-2007.html>, 2007.
- Zhang, Y., Wang, Y., Gray, B. A., Gu, D., Mauldin, L., Cantrell, C., and Bandy, A.: Surface and free tropospheric sources of methanesulfonic acid over the tropical Pacific Ocean, *Geophysical Research Letters*, 41, 5239–5245, <https://doi.org/10.1002/2014GL060934>, URL <http://doi.wiley.com/10.1002/2014GL060934>, 2014.
